# Supplementary material
Source: Springer Nature journal article supplement (https://www.springermedizin.de/resource/supplementary/12906_2012_1350_MOESM2_ESM.pdf/9522526)
Supplement: MOESM2 [file 9522526]

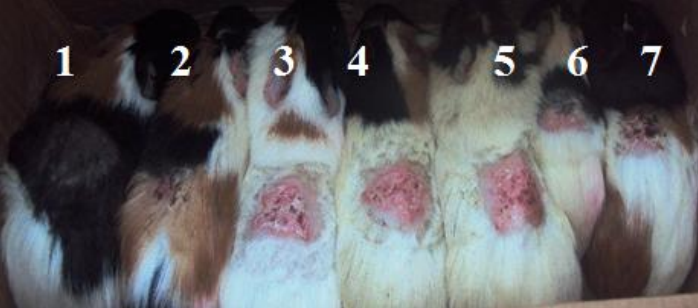

Animals six days post infection

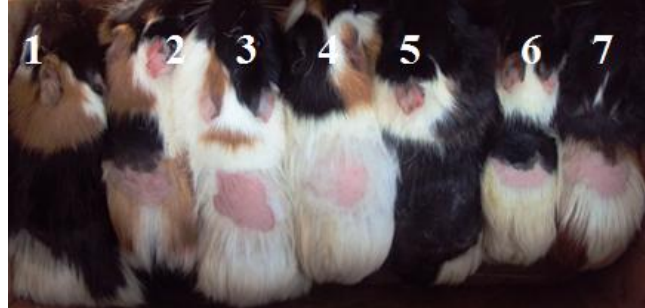

Animals after ten days of treatment

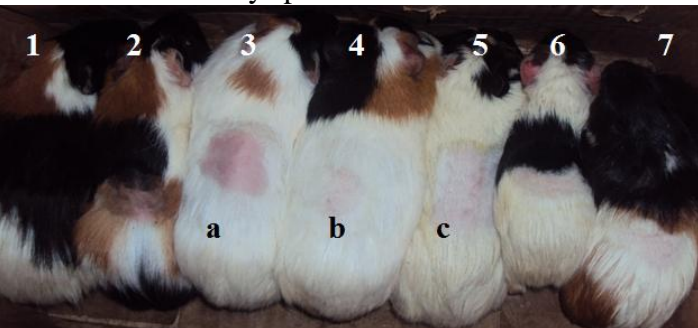

Animals after fifteen days of treatment

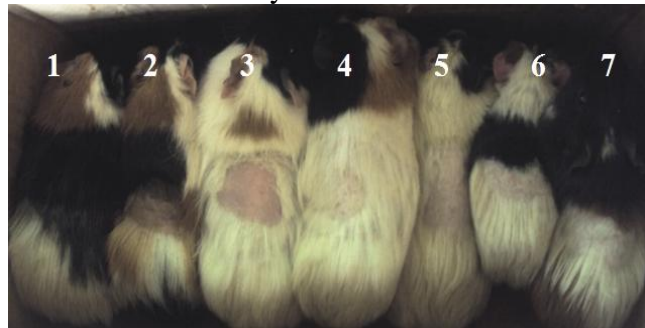

Animals after nineteen days of treatment
